# Supplementary material for: Sequencing and Genomic Analysis of Sorghum DNA Introgression Variant Line R21 and Recipient Rice Jin Hui 1 Revealed Repetitive Element Variation
Source: MDPI journal article supplement (doi:10.3390/ijms231911864), 2022-10-06
Supplement: s1 [file s1]

**Supplemental Table S1.** The refined chromosome number based on IRGSP-1.0.

| Length(bp) | R21        | Length(bp) | Jin Hui 1  | Length(bp) |
|------------|------------|------------|------------|------------|
| 43270923   | Hic_asm_0  | 45201676   | Hic_asm_0  | 45199504   |
| 35937250   | Hic_asm_2  | 37380711   | Hic_asm_2  | 38037874   |
| 36413819   | Hic_asm_1  | 39681045   | Hic_asm_1  | 39462501   |
| 35502694   | Hic_asm_3  | 36946273   | Hic_asm_3  | 37200980   |
| 29958434   | Hic_asm_7  | 31055467   | Hic_asm_8  | 30861223   |
| 31248787   | Hic_asm_6  | 31827323   | Hic_asm_7  | 32026469   |
| 29697621   | Hic_asm_8  | 29968225   | Hic_asm_9  | 29984113   |
| 28443022   | Hic_asm_5  | 31920571   | Hic_asm_5  | 30568245   |
| 23012720   | Hic_asm_10 | 25314955   | Hic_asm_10 | 25489020   |
| 23207287   | Hic_asm_11 | 25875158   | Hic_asm_11 | 25564507   |
| 29021106   | Hic_asm_4  | 32780025   | Hic_asm_4  | 32677099   |
| 27531856   | Hic_asm_9  | 27486733   | Hic_asm_6  | 28727372   |

**Supplemental Table S2.** BLAST analysis of repeat atr0026 on Gramineae.

| Accession            | Description                                                                                                                                                                                      | Hit<br>Score | E<br>value | Num<br>HSPs | Top<br>query<br>coverage | Top<br>identity |
|----------------------|--------------------------------------------------------------------------------------------------------------------------------------------------------------------------------------------------|--------------|------------|-------------|--------------------------|-----------------|
| ORSiRGRR<br>00000367 | gi 37545144 gb AY120865.1 <br>Oryza longistaminata small<br>subunit ribosomal RNA gene,<br>partial sequence                                                                                      | 1578         | 0          | 1           | 30.89                    | 97.1            |
| TRSiRGRR<br>00000061 | gi 15982656 gb AY049040.1 <br>Triticum aestivum 18S ribosomal<br>RNA gene, partial sequence                                                                                                      | 1582         | 0          | 1           | 31.12                    | 96.95           |
| ZRSiRGRR<br>00000002 | gi 1777706 gb U42796.1 ZMU42<br>796 Zea mays 18S ribosomal RNA<br>gene, partial sequence                                                                                                         | 1526         | 0          | 1           | 30                       | 96.9            |
| HRSiRGRR<br>00000017 | gi 471983 471985 471986<br>gi 6273812 gb AF168852.1 AF16<br>8852 Hordeum jubatum 18S small<br>subunit ribosomal RNA gene,<br>complete sequence                                                   | 1523         | 0          | 1           | 29.94                    | 96.89           |
| TRSiRGRR<br>00000030 | gi 7209267 emb AJ272181.1 TAE<br>272181 Triticum aestivum 18S<br>rRNA gene for 18S ribosomal<br>RNA, strain MV-15   gi 3402540<br>gi 20359 emb X00755.1 OSRRN1<br>7S Rice gene for 17S ribosomal | 1544         | 0          | 1           | 30.39                    | 96.88           |
| ORSiRGRR<br>00000008 | RNA   gi 3342031 472184 472185<br>472186 472187 472188 472189<br>472183 18S small subunit<br>ribosomal RNA gene                                                                                  | 1569         | 0          | 1           | 31.2                     | 96.8            |

|                      |                                                                                                                                                               |      |   |   |       |       |
|----------------------|---------------------------------------------------------------------------------------------------------------------------------------------------------------|------|---|---|-------|-------|
|                      | gi 3342031 gb AF069218.1 AF06                                                                                                                                 |      |   |   |       |       |
| ORSiRGRR<br>00000034 | 9218 Oryza sativa 18S small<br>subunit ribosomal RNA gene,<br>complete sequence                                                                               | 1515 | 0 | 1 | 30.08 | 96.79 |
| ZRSiRGRR<br>00000004 | gi 168608 gb K02202.1 MZERG1<br>7S Maize 17S ribosomal RNA gene<br>and flanks                                                                                 | 1481 | 0 | 1 | 31.89 | 95.48 |
| TRSiRGRR<br>00000062 | gi 15982657 gb AY049041.1 <br>Triticum aestivum 28S ribosomal<br>RNA gene, partial sequence                                                                   | 2089 | 0 | 2 | 47.95 | 93.99 |
| ORSiRGRR<br>00000006 | gi 169818 gb M11585.1 RICRGH<br>A Rice 25S ribosomal RNA gene<br>  gi 175854 427193 472191 472195<br>28S rRNA gene gi 169815 2796928<br>2799921 25S rRNA gene | 2426 | 0 | 1 | 58.3  | 93.42 |

---

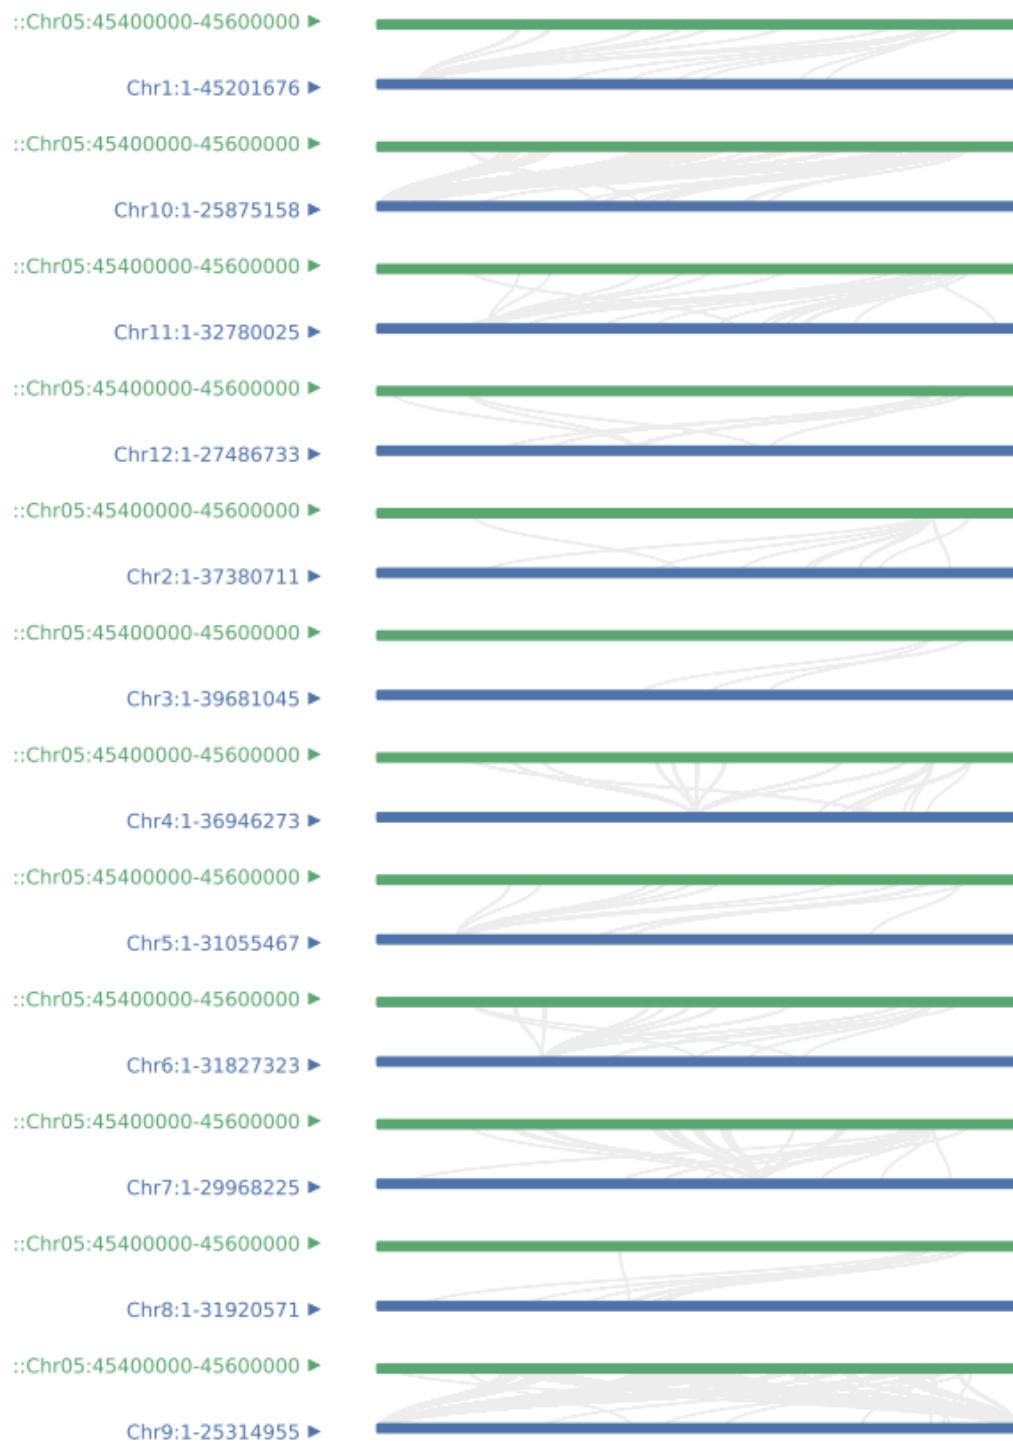

**Supplemental Figure S1.** Colinearity analysis of sorghum candidate analysis sequences with chromosomes of R21 genome.

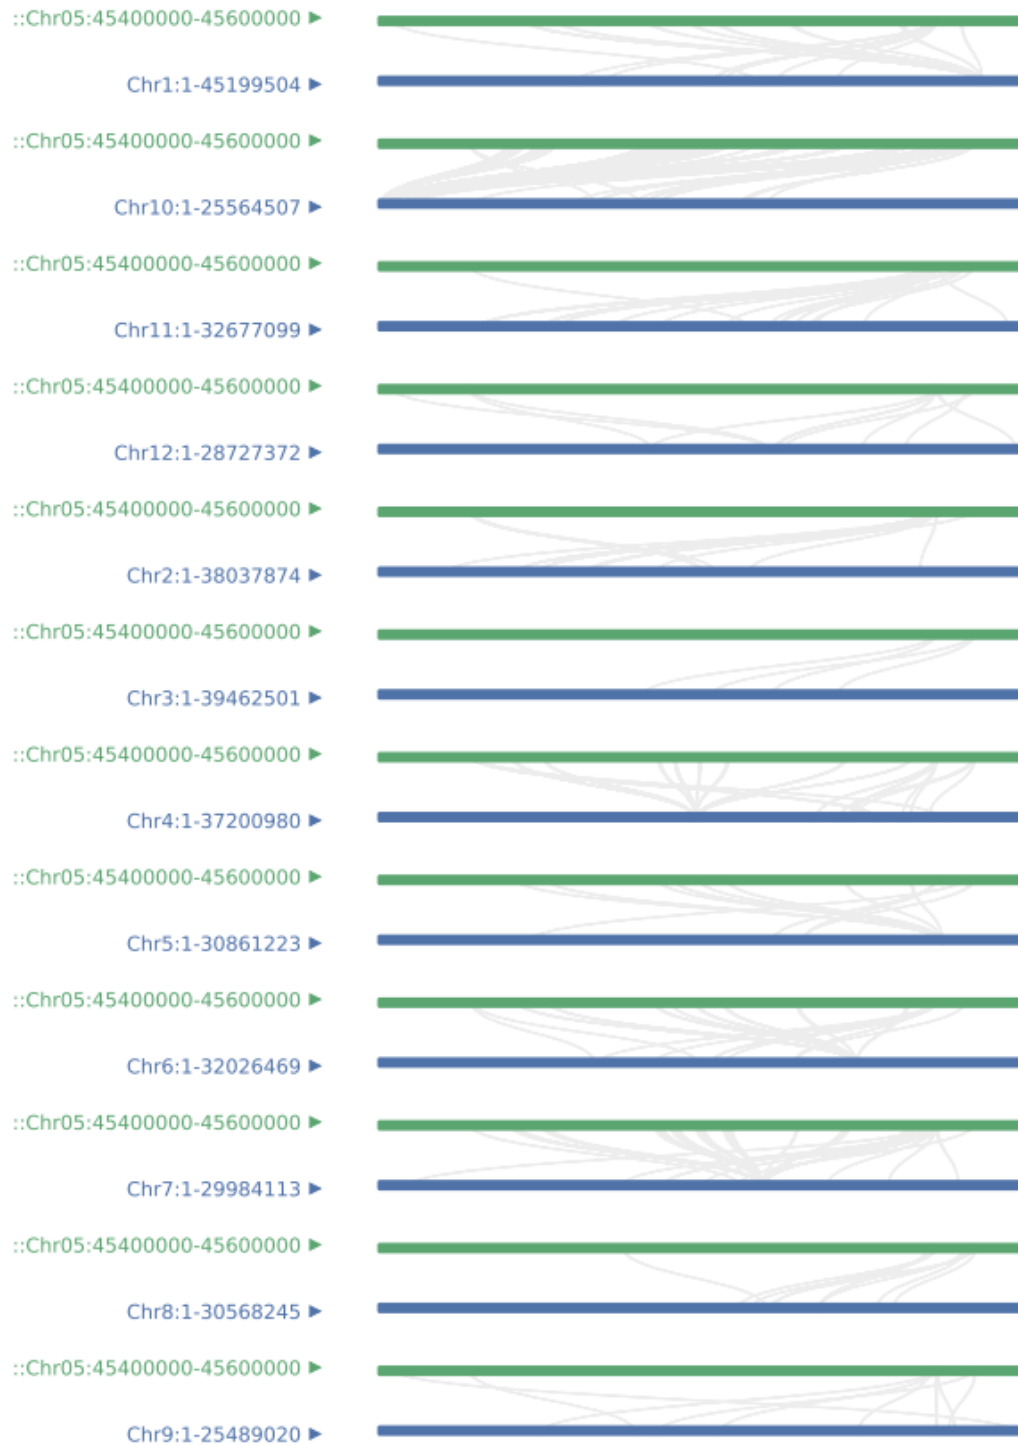

**Supplemental Figure S2.** Colinearity analysis of sorghum candidate analysis sequences with chromosomes of Jin Hui 1 genome.

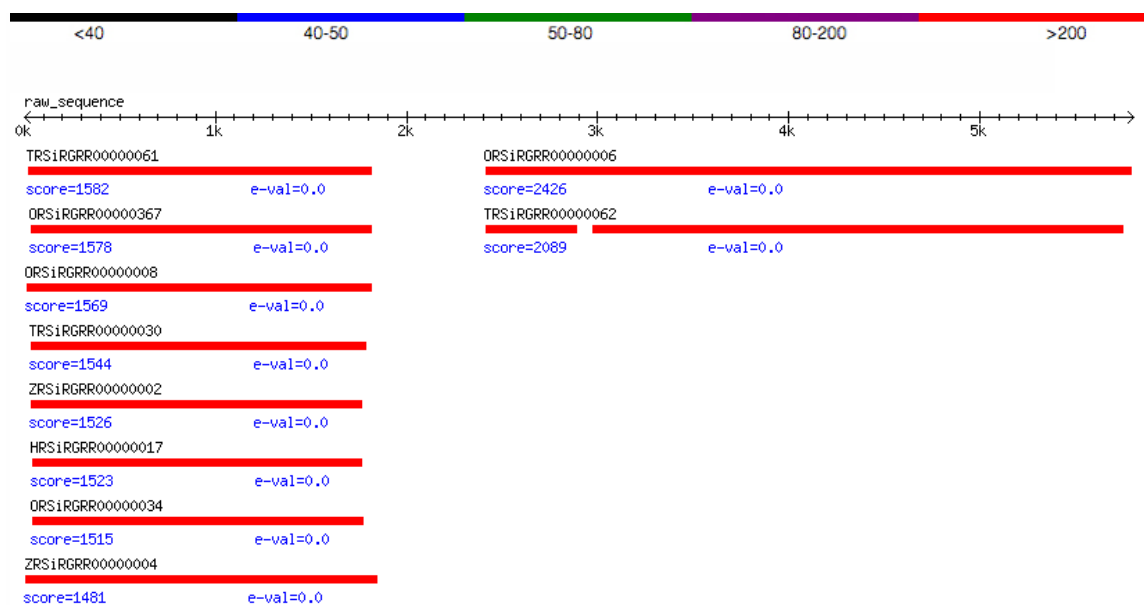

**Supplemental Figure S3.** BLAST analysis of repeat atr0026 on Gramineae. Legend represents Hit score.
